# Supplementary material
Source: publisher figshare collection journal article supplement (https://tandf.figshare.com/ndownloader/files/30921805)
Supplement: Supplementary file 1 [file 30921805]

## Supplementary data

Fig. 1 Comparison of GC-MS chromatograms of aquaria water samples at 1 h (black line) and 24 h (pink line) after the renewal of endosulfan concentration. Peaks 1 and 2 are the  $\alpha$ - and  $\beta$ -endosulfan, respectively.

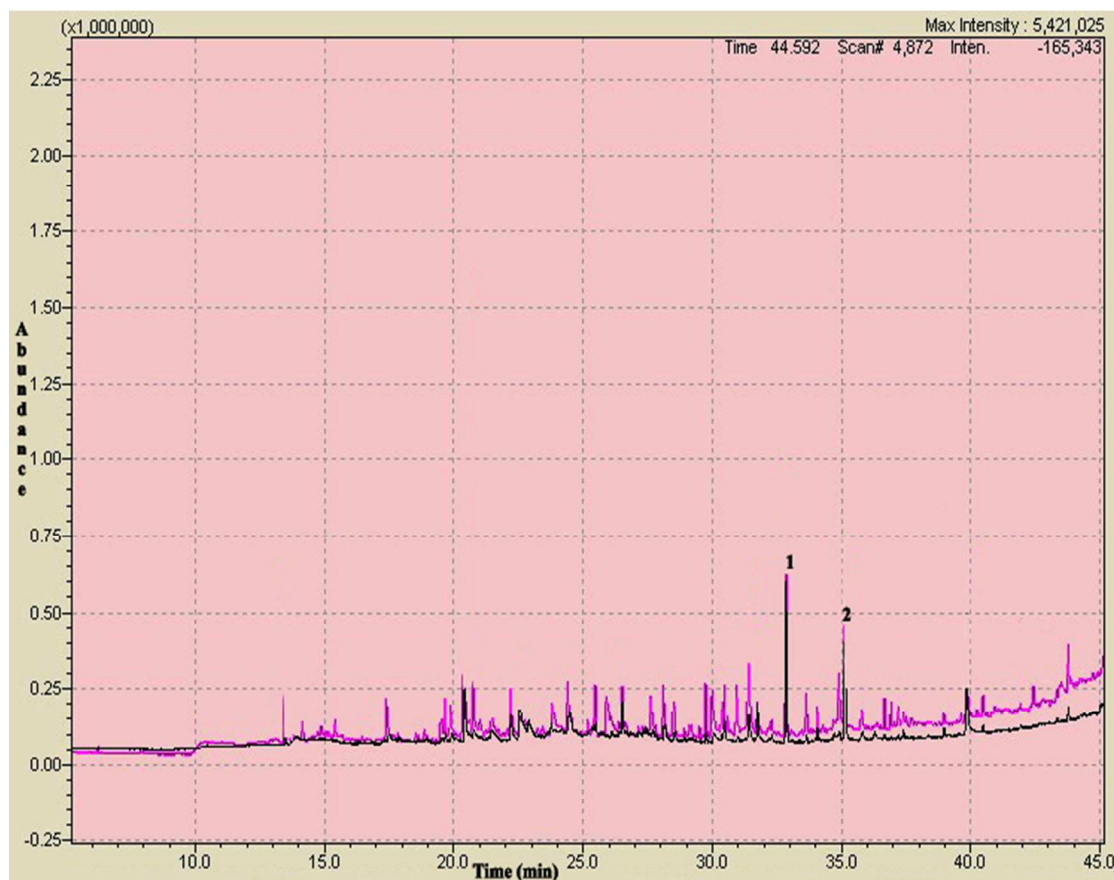

**Table 1:** Phytocomponents identified in the active methanolic fraction (ME-F2) of *P. hexandrum* by GC-MS.

| No. | RT    | Compound name                                                              | Mol. formula                                   | MW  | Compound nature              | Peak-area % |
|-----|-------|----------------------------------------------------------------------------|------------------------------------------------|-----|------------------------------|-------------|
| 1.  | 9.06  | Tetradecane                                                                | C <sub>14</sub> H <sub>30</sub>                | 198 | Alkane hydrocarbon           | 0.43        |
| 2.  | 11.11 | 2,3-dihydro-3,5-dihydroxy-6-methyl-4H-pyran-4-one                          | C <sub>6</sub> H <sub>8</sub> O <sub>4</sub>   | 144 | Flavonoid fraction           | 30.96       |
| 3.  | 14.18 | 5-(Hydroxymethyl)-2-furancarboxaldehyde                                    | C <sub>6</sub> H <sub>6</sub> O <sub>3</sub>   | 126 | Aldehyde compound            | 28.65       |
| 4.  | 27.40 | Hexadecanoic acid, methyl ester                                            | C <sub>17</sub> H <sub>34</sub> O <sub>2</sub> | 270 | Fatty acid ester             | 27.07       |
| 5.  | 29.07 | 9, 12-Octadecadienoic acid, methyl ester (Z,Z)                             | C <sub>19</sub> H <sub>34</sub> O <sub>2</sub> | 294 | Linoleic- acid, methyl-ester | 2.08        |
| 6.  | 32.24 | 9, 12,15-Octadecatrienoic acid, methyl ester, (Z,Z,Z)                      | C <sub>19</sub> H <sub>32</sub> O <sub>2</sub> | 292 | Linoleic- acid, methyl-ester | 2.16        |
| 7.  | 48.36 | deoxy-podophyllotoxin                                                      | C <sub>22</sub> H <sub>22</sub> O <sub>7</sub> | 398 | Lignan                       | 2.83        |
| 8.  | 48.69 | podophyllotoxin                                                            | C <sub>22</sub> H <sub>22</sub> O <sub>8</sub> | 414 | Lignan                       | 2.92        |
| 9.  | 49.66 | epiisopodophyllotoxin-acetate                                              | C <sub>24</sub> H <sub>24</sub> O <sub>9</sub> | 456 | Lignan                       | 0.47        |
| 10. | 51.27 | 9H-Furo[2,3-H]chromene-2,8-dione, 4-methyl-9-(3,4,5-trimethoxybenzylidene) | C <sub>22</sub> H <sub>18</sub> O <sub>7</sub> | 394 | Chromene compound            | 2.34        |

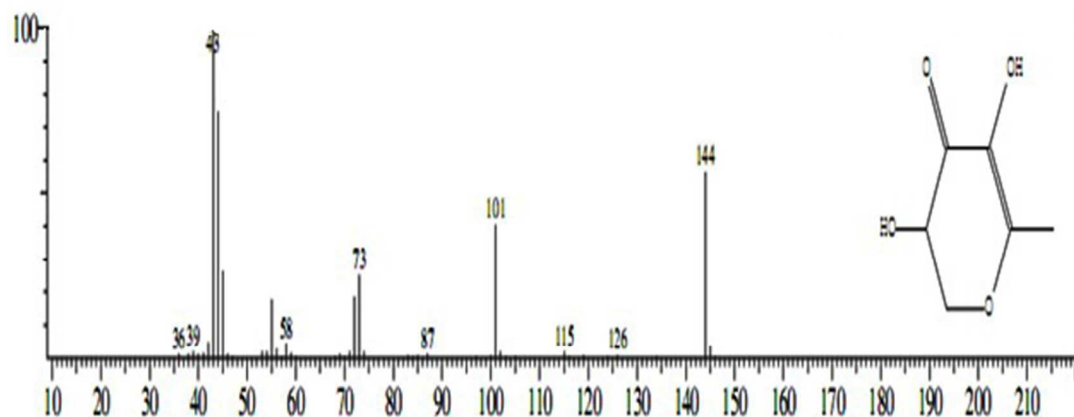

Fig. 2 Mass spectrum of the major compound of methanolic fraction (ME-F2): 2,3-dihydro-3,5-dihydroxy-6-methyl-4H-pyran-4-one.

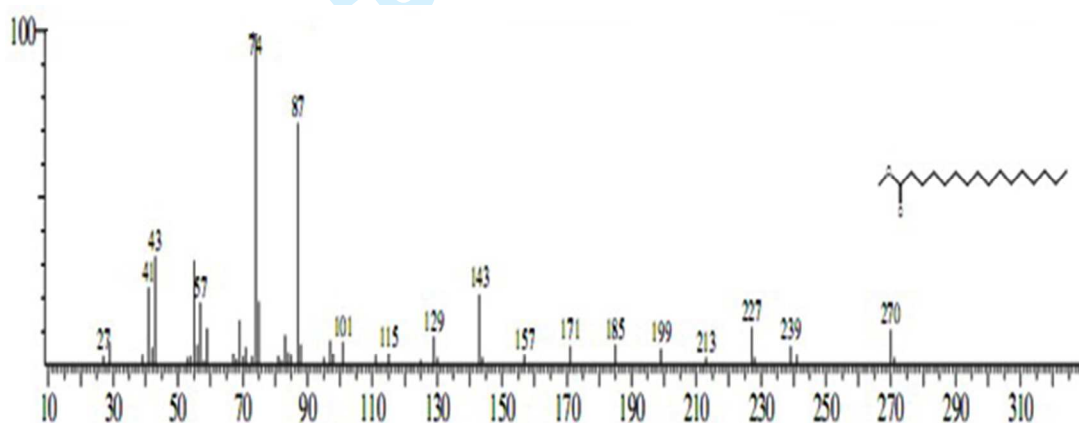

Fig. 3 Mass spectrum of the major compound of methanolic fraction (ME-F2): 5-(Hydroxymethyl)-2-furancarboxaldehyde.

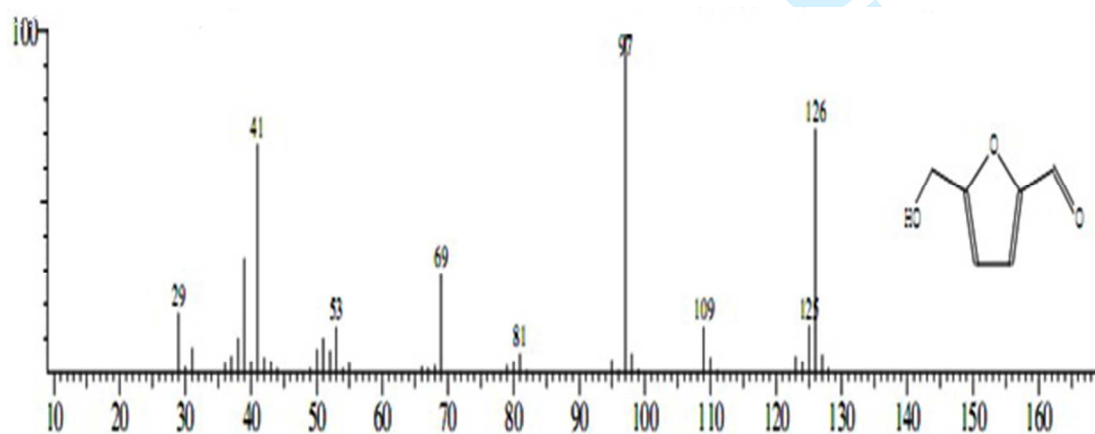

Fig. 4 Mass spectrum of the major compound of methanolic fraction (ME-F2): Hexadecanoic acid, methyl ester.

**Table 2** Phytocomponents identified in the active ethyl-acetate fraction (EE-F2) of *P. hexandrum* by GC-MS.

| No. | RT    | Compound name                                                | Mol. formula                                   | MW  | Compound nature  | Peak-area % |
|-----|-------|--------------------------------------------------------------|------------------------------------------------|-----|------------------|-------------|
| 1   | 24.08 | <i>n</i> -hexadecanoic acid                                  | C <sub>16</sub> H <sub>32</sub> O <sub>2</sub> | 256 | Palmitic acid    | 15.47       |
| 2   | 39.12 | (3β)-Stigmast-5-en-3-ol                                      | C <sub>29</sub> H <sub>50</sub> O              | 414 | Steroid          | 8.62        |
| 3   | 44.53 | (3β)-lanost-8-en-3-ol                                        | C <sub>30</sub> H <sub>52</sub> O              | 458 | Steroid          | 1.14        |
| 4   | 45.45 | (3β)-Stigmasta-5,22-dien-3-ol, acetate                       | C <sub>31</sub> H <sub>50</sub> O <sub>2</sub> | 454 | Steroid          | 9.41        |
| 5   | 48.32 | Podophyllotoxin, deoxy                                       | C <sub>22</sub> H <sub>22</sub> O <sub>7</sub> | 398 | Lignan           | 24.22       |
| 6   | 49.63 | Podophyllotoxin                                              | C <sub>22</sub> H <sub>22</sub> O <sub>8</sub> | 414 | Lignan           | 18.91       |
| 7   | 51.22 | Epiisopodophyllotoxin-acetate                                | C <sub>24</sub> H <sub>24</sub> O <sub>9</sub> | 456 | Lignan           | 21.13       |
| 8   | 53.67 | 2,4-Hexadienedioic acid, 3,4-diethyl-, dimethyl ester, (Z,Z) | C <sub>26</sub> H <sub>30</sub> O <sub>2</sub> | 374 | Fatty acid ester | 1.10        |

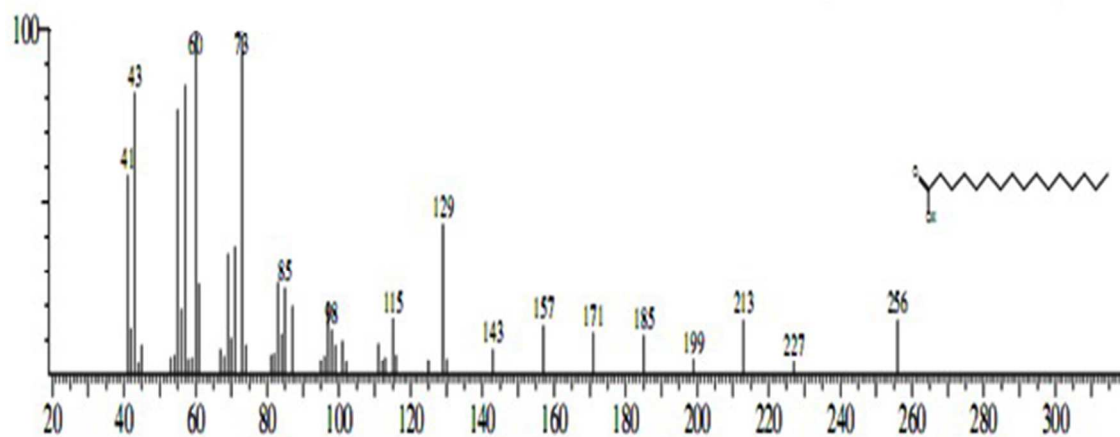

Fig. 5 Mass spectrum of the major compound of methanolic fraction (ME-F2): *n*-hexadecanoic acid.

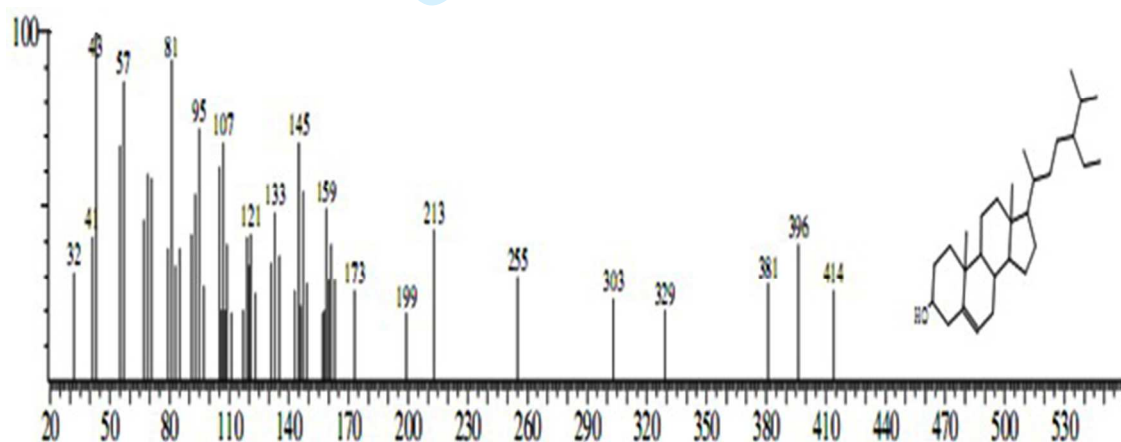

Fig. 6 Mass spectrum of the major compound of methanolic fraction (ME-F2): (3 $\beta$ )-Stigmast-5-en-3-ol.

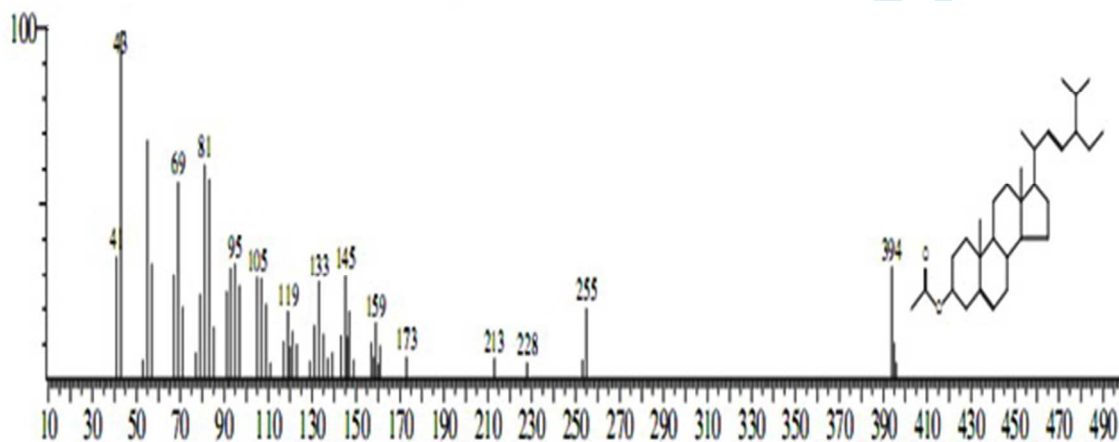

Fig. 7 Mass spectrum of the major compound of methanolic fraction (ME-F2): (3 $\beta$ )-Stigmasta-5,22-dien-3-ol, acetate.

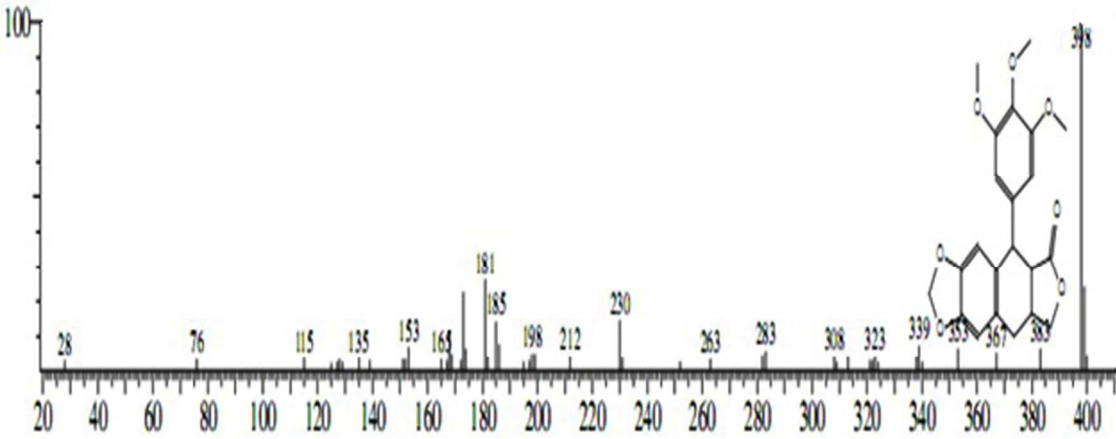

Fig. 8 Mass spectrum of the major compound of methanolic fraction (ME–F2): Podophyllotoxin, deoxy.

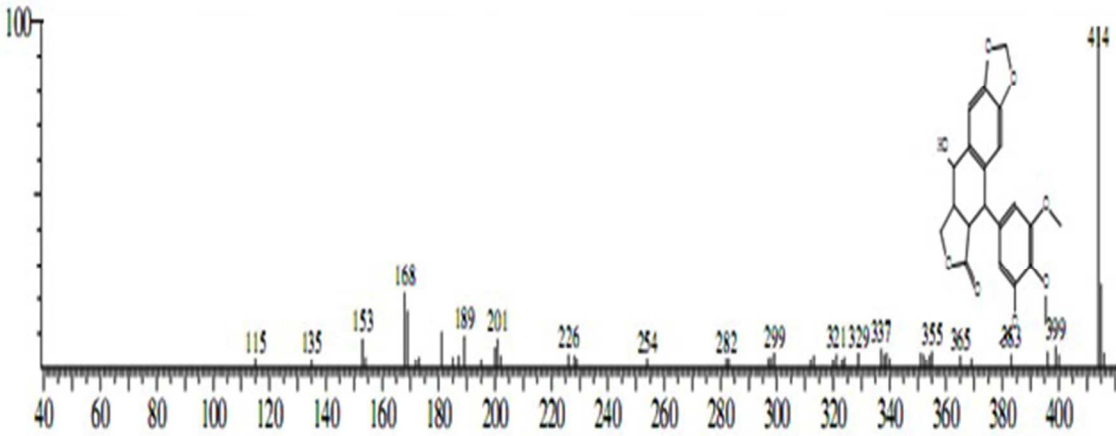

Fig. 9 Mass spectrum of the major compound of methanolic fraction (ME–F2): podophyllotoxin.

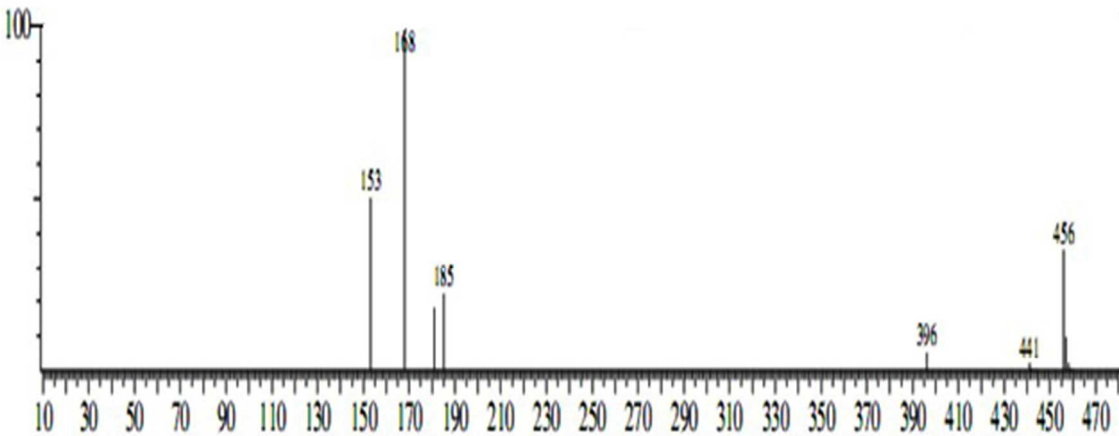

Fig. 10 Mass spectrum of the major compound of methanolic fraction (ME–F2): Epiisopodophyllotoxin-acetate.
